# Supplementary material
Source: PubMed Central journal article supplement (PMC9400550)
Supplement: NIHMS1653491-supplement-2.pdf [file NIHMS1653491-supplement-2.pdf]

**a**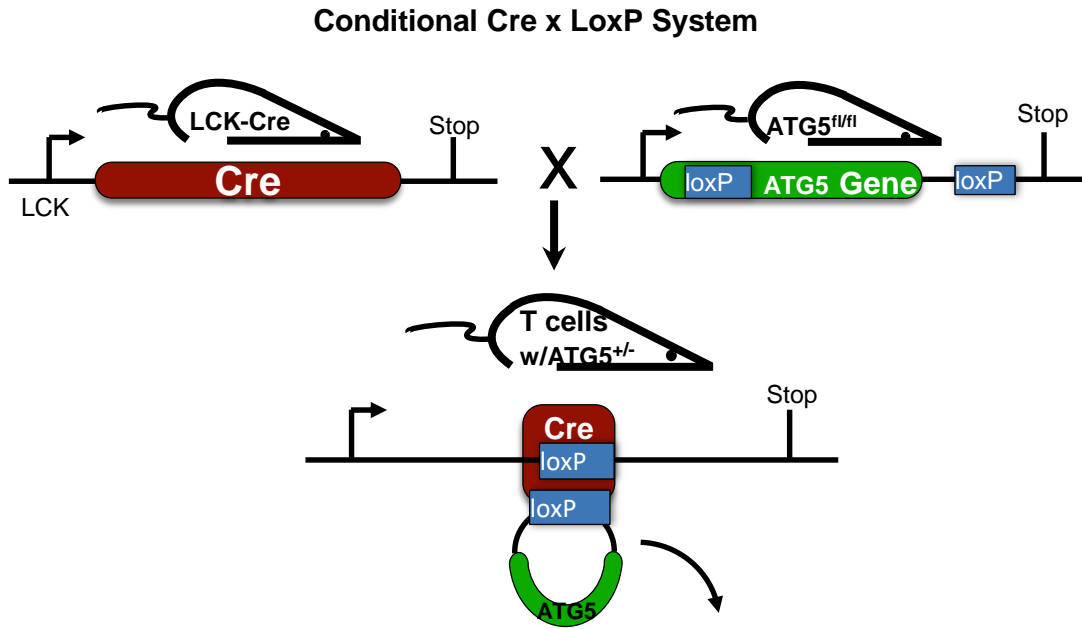**b**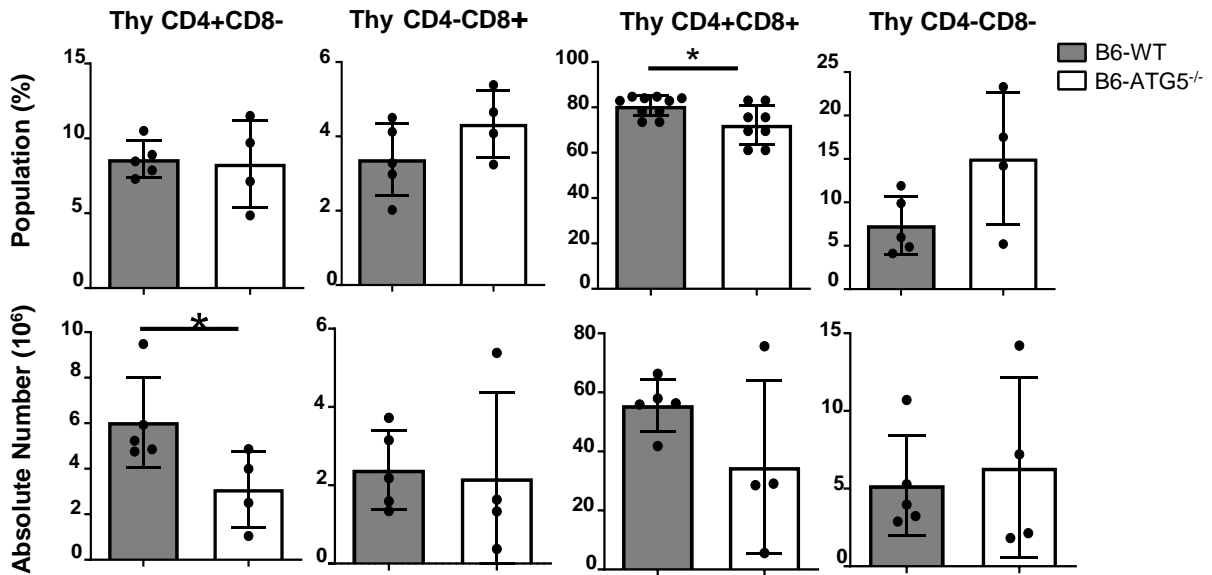**c**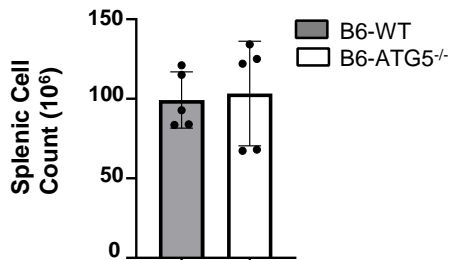**d**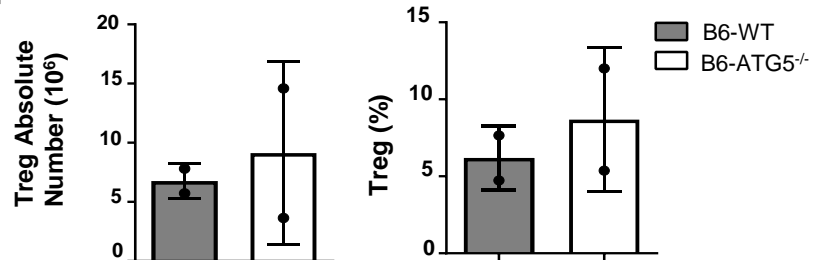

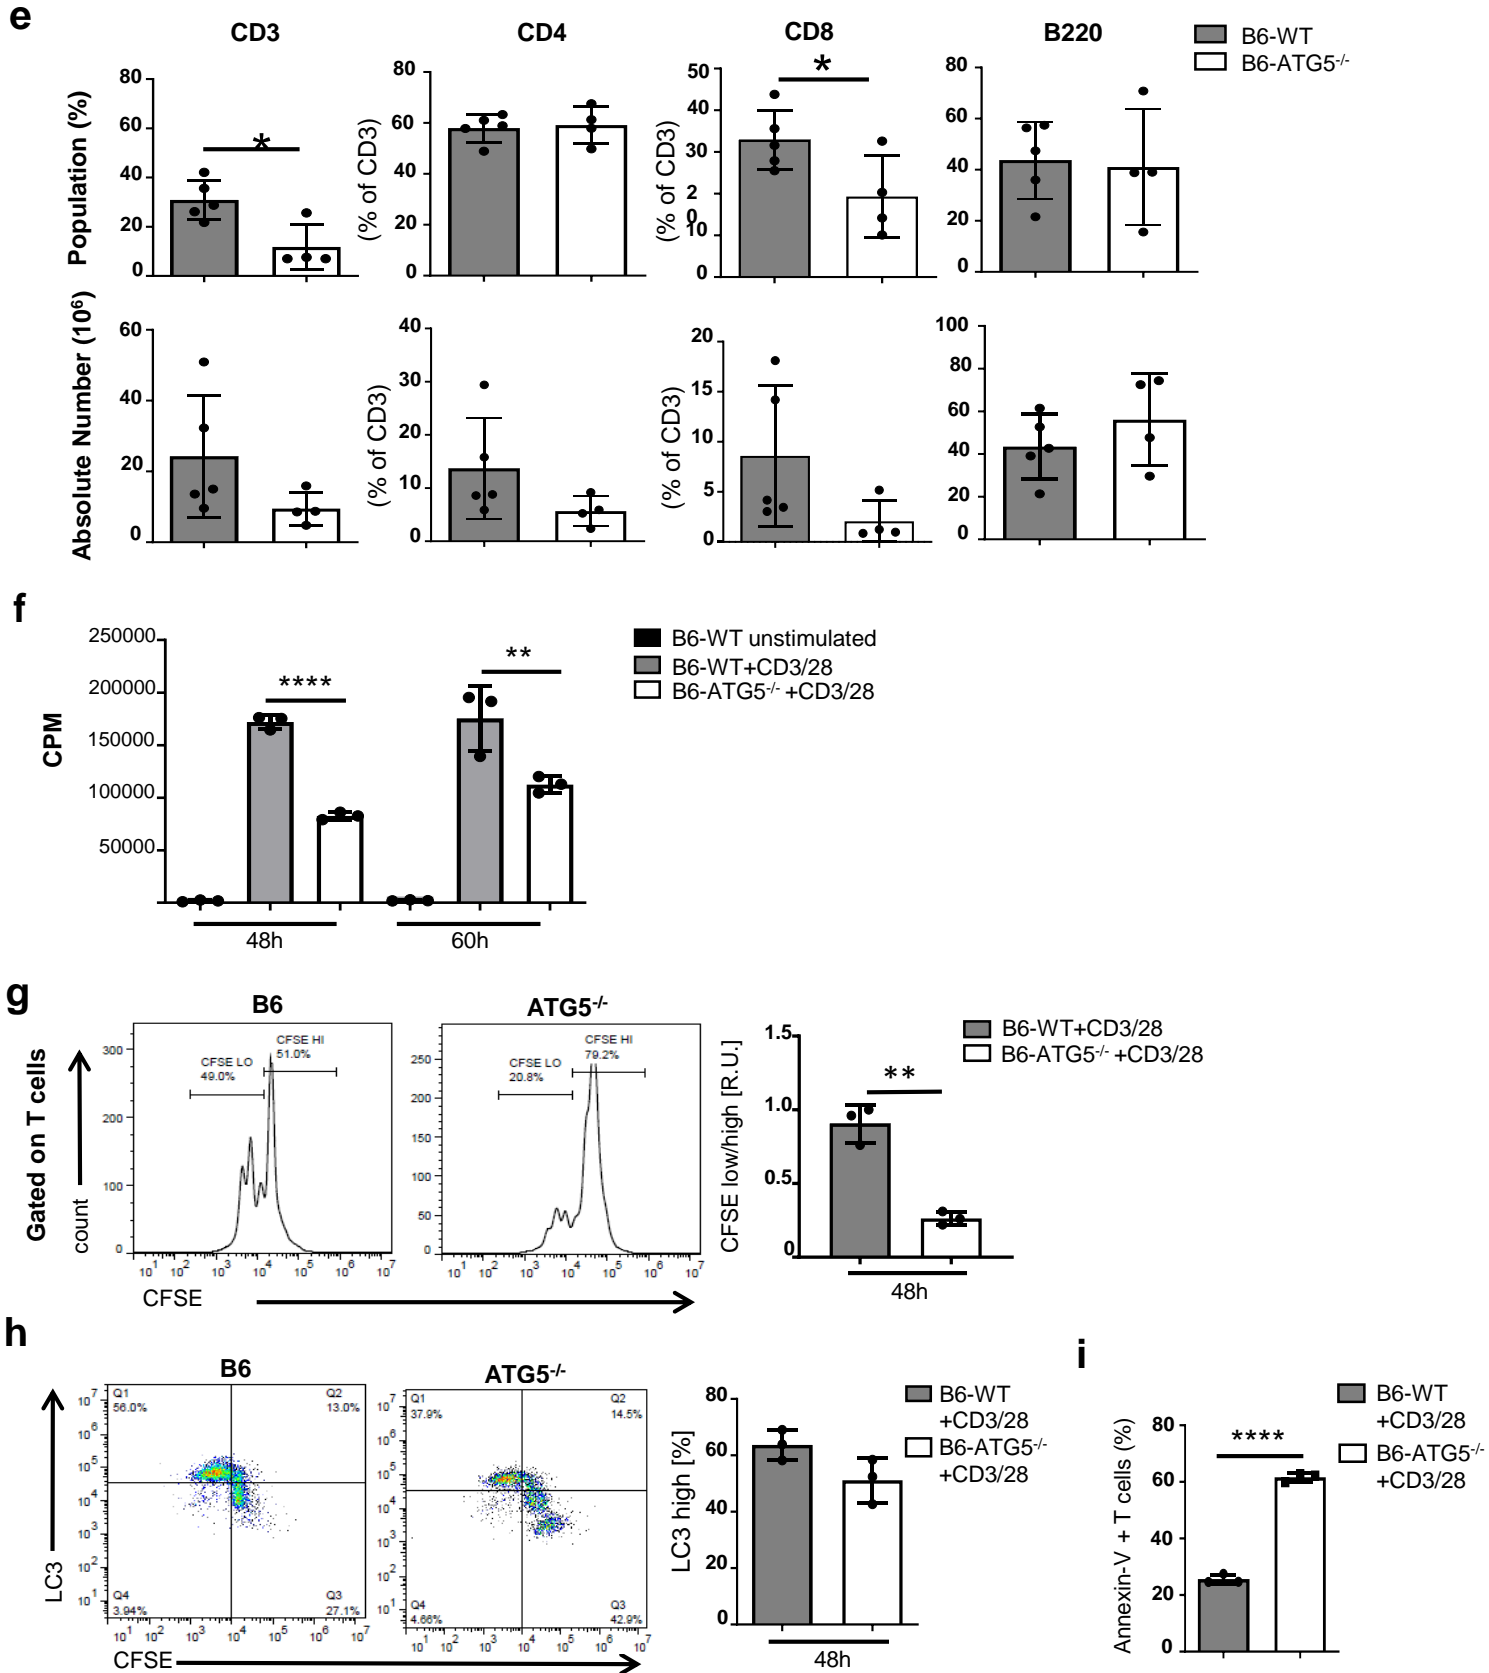

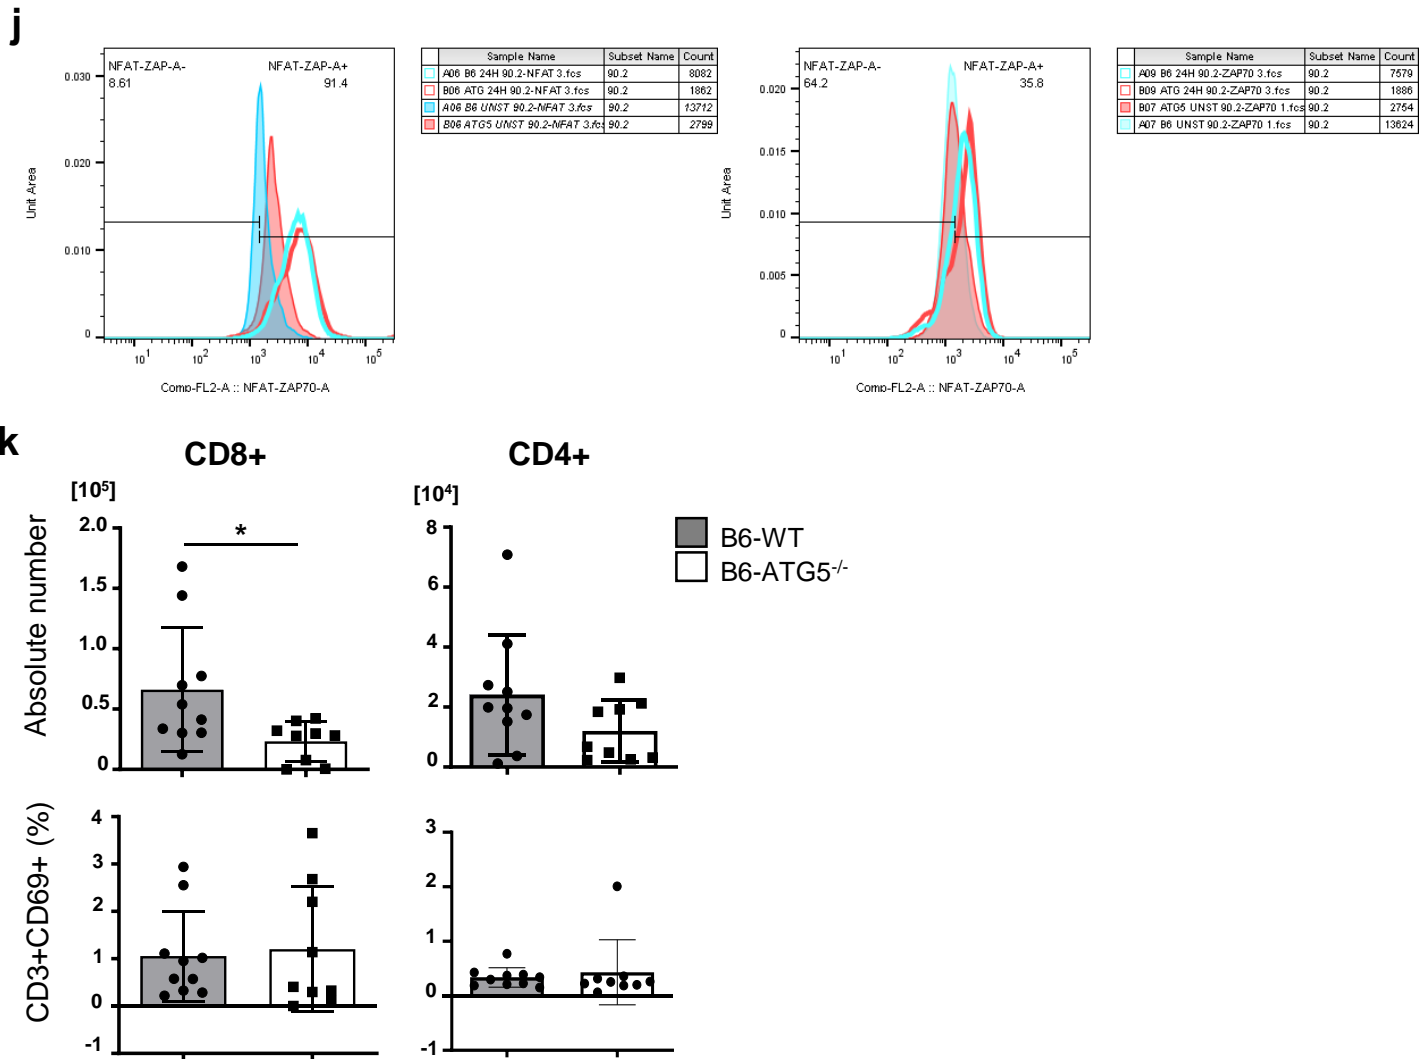

**SFig. 2 Phenotypic analysis of ATG5<sup>-/-</sup> knockout animals. (a)** Schematic of the Conditional Cre-LoxP system **(b)** B6-WT and B6-ATG5<sup>-/-</sup> mice thymic profile. Whole spleens were analyzed by flow cytometry to phenotypic analysis of cell populations between B6-WT and B6-ATG5<sup>-/-</sup> mice. **(c)** Whole spleen cellularity from B6-WT and B6-ATG5<sup>-/-</sup> mice **(d)** Treg profiles **(e)** Lymphocytic cell populations and absolute numbers **(f)** CD90.2-positive B6-WT and B6-ATG5<sup>-/-</sup> T cells were purified, before being transferred to a stimulation plate previously coated with anti-CD3/CD28. Unstimulated T cells serve as controls. T cell proliferation based on <sup>3</sup>H-thymidine incorporation was analyzed at 48 and 60 hours. The data in CPM are the mean  $\pm$  SEM of triplicates from 2 independent experiments. **(g)** T cells were labeled with CFSE prior to stimulation with anti-CD3/CD28 and analyzed for CFSE dilution at 48 hours. Left panel: representative histograms of CFSE dilution. Right panel: mean of the ratios CFSE<sup>low</sup>/CFSE<sup>high</sup>  $\pm$  SEM of triplicates. Data are representative of 2 independent experiments. **(h)** B6-WT and B6-ATG5<sup>-/-</sup> T cells were sorted, labeled with CFSE and stimulated with CD3/28 as in Supplemental Figure 2g. At 48h, they were harvested, stained intracellular for LC3 and analyzed by FACS. Left panel: representative figures gated on T cells for CFSE<sup>high/low</sup> and LC3<sup>high/low</sup> populations. Right panel: the graph represents the mean percentage of LC3<sup>high</sup> CD90.2-positive T cells  $\pm$  SEM of triplicates **(i)** After CD3/28 stimulation for 48h, activated B6-WT and B6-ATG5<sup>-/-</sup> T cells were stained with Annexin-V and analyzed by flow cytometry. (i) Data is representative of 2 independent experiments. **(j)** Histogram overlays of flow cytometry data at 24 hr time point analysis of Left Panel: NFAT Right Panel: Zap-70. These are representative histograms from 3 independent experiments. **(k)** Donor T cells were analyzed for activation markers 7 days post BMT transplant. \*P < 0.05; \*\*P < 0.01; \*\*\*P < 0.001; \*\*\*\*P < 0.0001.
