# Supplementary material
Source: PubMed Central journal article supplement (PMC9400550)
Supplement: NIHMS1653491-supplement-3.pdf [file NIHMS1653491-supplement-3.pdf]

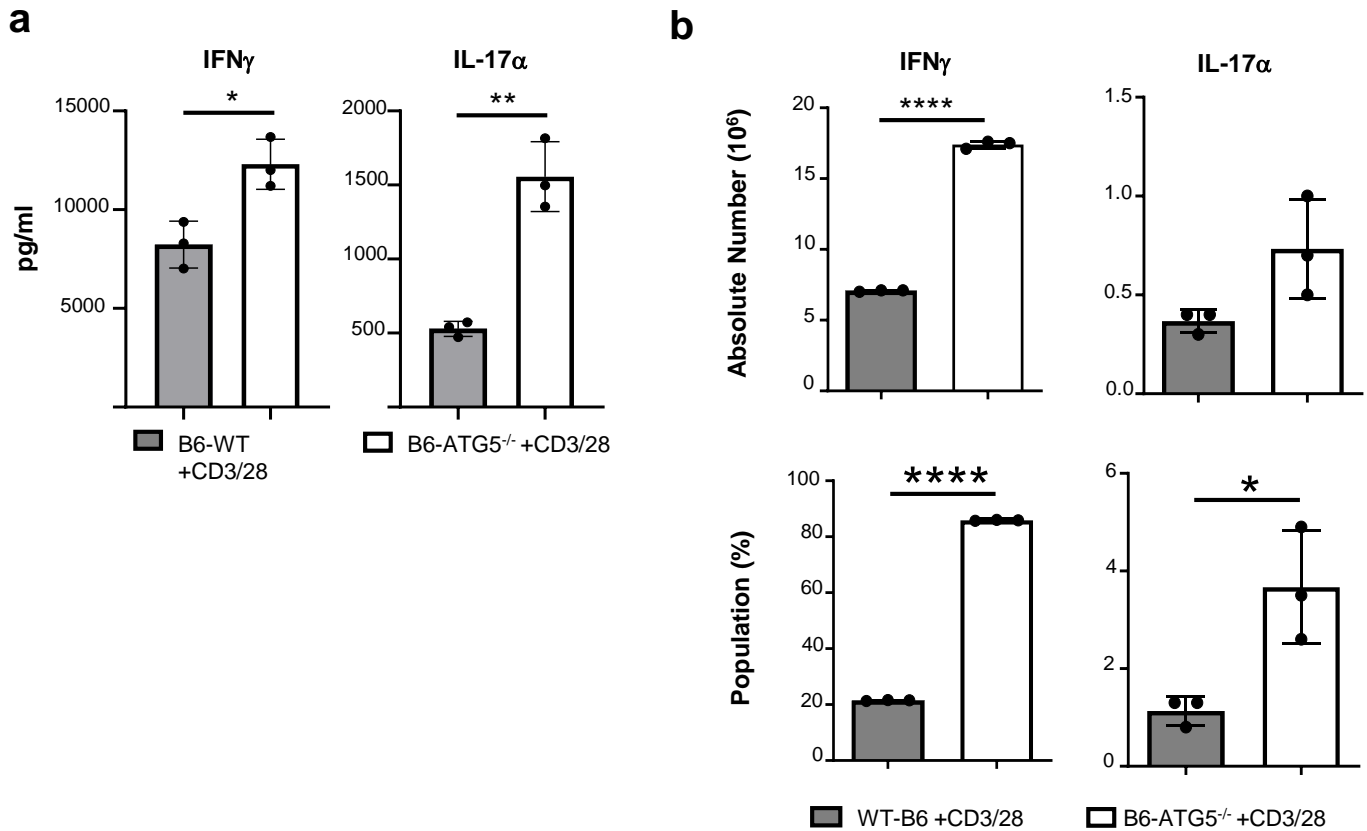

### SFig. 3 Cytokine profile of ATG5-deficient T<sub>con</sub> cells.

Sorted B6-WT and B6-ATG5<sup>-/-</sup> T<sub>con</sub> cells were stimulated for 48h in an MLR with CD3/CD28 from WT-B6 or ATG5<sup>-/-</sup> mice (a) Supernatants from the MLR were analyzed with ELISA for IFN $\gamma$  or IL-17a (b) Cells were harvested and stained for intracellular cytokine and analyzed by flow cytometry for IFN $\gamma$  or IL-17a. The graphs show the mean of triplicates  $\pm$  SD and are representative of 2 independent experiments. \*P < 0.05; \*\*P < 0.01; \*\*\*P < 0.001; \*\*\*\*P < 0.0001.
