# Supplementary material
Source: PubMed Central journal article supplement (PMC9400550)
Supplement: NIHMS1653491-supplement-5.pdf [file NIHMS1653491-supplement-5.pdf]

a

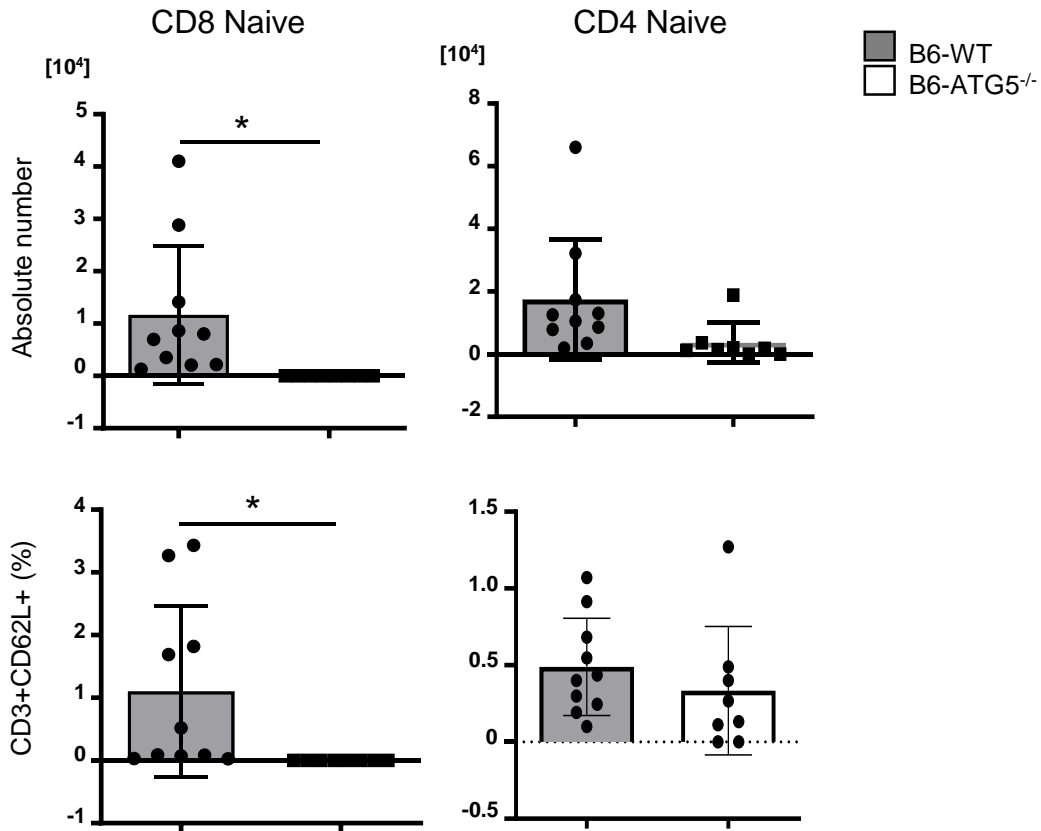

### SFig. 5 B6-WT and ATG5-deficient Naïve T cells Populations.

Donor B6-WT and B6-ATG5<sup>-/-</sup> T cells were isolated 7 days post BMT transplant. (a) Cells were harvested and stained for CD3+CD62L with either CD4+ or CD8+ and analyzed by flow cytometry.

\*P < 0.05; \*\*P < 0.01; \*\*\*P < 0.001; \*\*\*\*P < 0.0001.
