# Supplementary material
Source: PubMed Central journal article supplement (PMC9400550)
Supplement: NIHMS1653491-supplement-6.pdf [file NIHMS1653491-supplement-6.pdf]

| Criteria           | Score<br>0 | Score<br>0.5               | Score<br>1                     | Score<br>1.5                                        | Score<br>2                                                 |
|--------------------|------------|----------------------------|--------------------------------|-----------------------------------------------------|------------------------------------------------------------|
| <b>Weight Loss</b> | <10%       |                            | >10% to <25%                   |                                                     | >25%                                                       |
| <b>Posture</b>     | Normal     | Mild Kyphosis only at rest | Moderate kyphosis              | Strong kyphosis/ slightly impaired movement         | Severe hunching distinct impaired movement                 |
| <b>Activity</b>    | Normal     | Mild decreased             | Mild to moderately decreased   | Stationary until stimulated, coordination disorders | Lethargy, paralysis, staggering                            |
| <b>Fur</b>         | Normal     | Mild ruffling              | Moderate ruffling              | Severe ruffling/mild fur loss                       | Severe ruffling/poor grooming/ moderate to severe fur loss |
| <b>Skin</b>        | Normal     | Reddish, irritated areas   | Scaling, dry skin areas (<20%) | Scaling, dry skin areas (>20%)                      | Scaling, dry skin areas (>40%), open, bloody skin areas    |

Table S1. GVHD Scoring. Mice were individually scored once a week for five clinical parameters (posture, activity, fur, skin and weight loss) on a scales from 0-2. Clinical GVHD score was assessed by summation of these parameters. Animals were sacrificed when reaching a clinical GVHD score of 6.
